# Supplementary material
Source: Springer Nature journal article supplement (https://www.springermedizin.de/resource/supplementary/13048_2009_29_MOESM2_ESM.pdf/9664740)

pERK1/2

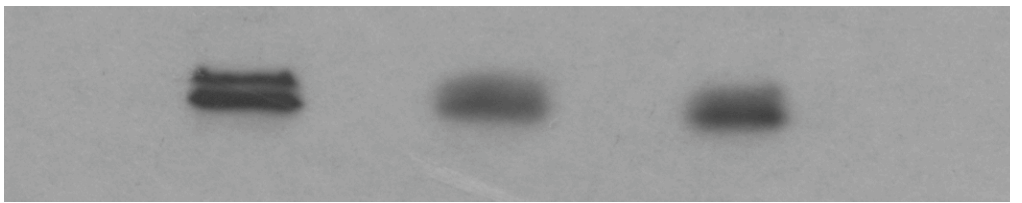

$\beta$ -ACTIN

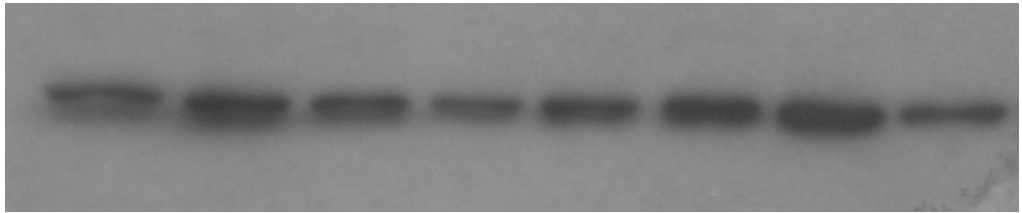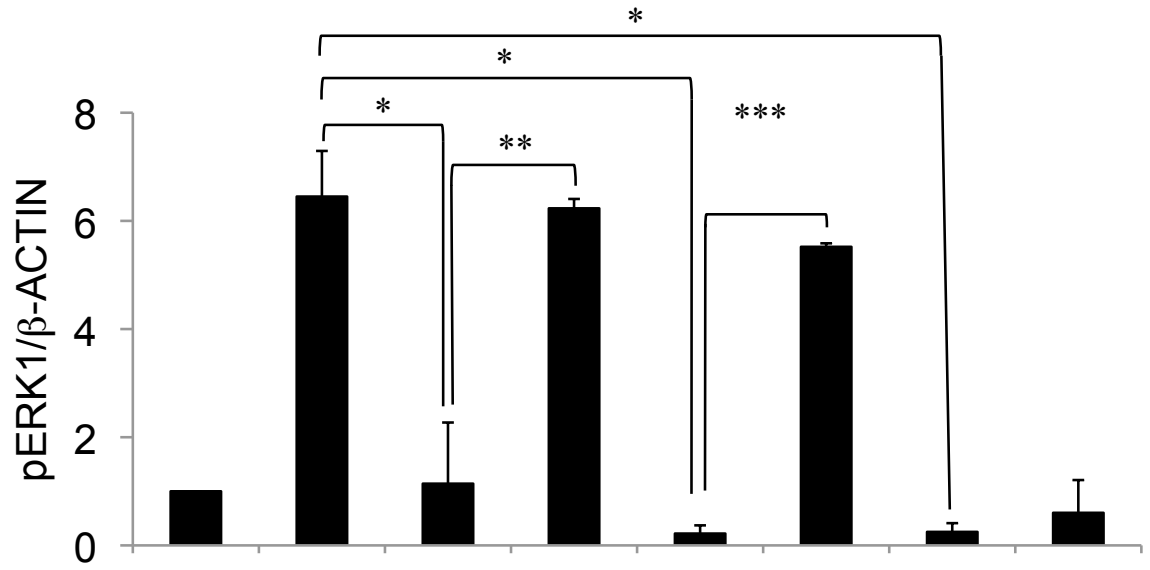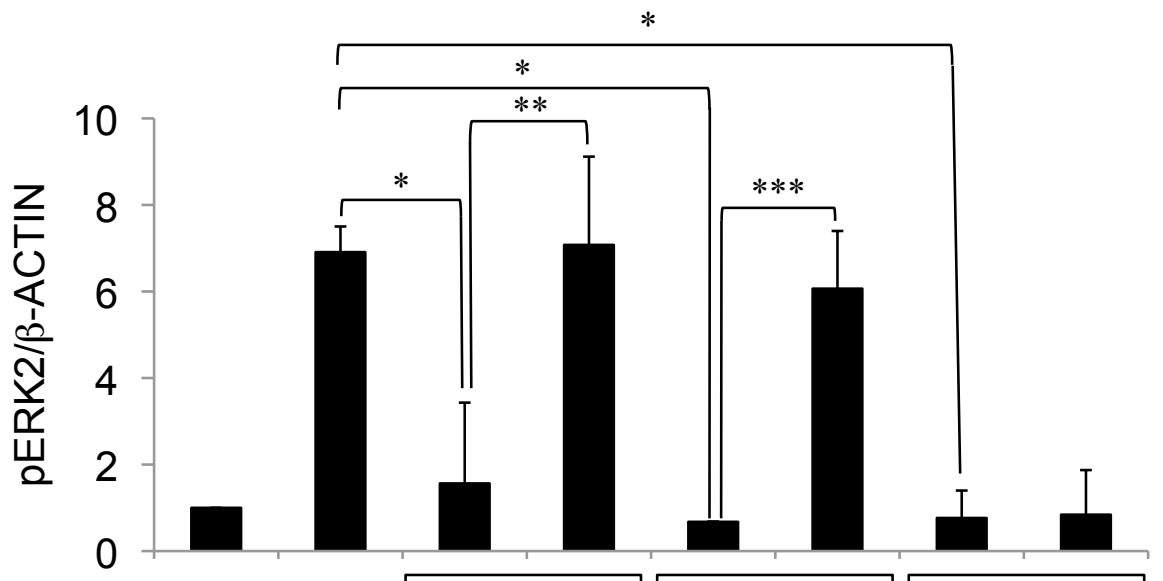

|        |   |   |      |   |     |   |        |
|--------|---|---|------|---|-----|---|--------|
| FSH+LH | - | + | +    | + | +   | + | +      |
| EGF    | - | - | -    | + | -   | + | +      |
|        |   |   | +H89 |   | +SB |   | +U0126 |

Supplement: MOESM2 [file 9664740]
